# Supplementary material for: From Fields to Cities: Mapping Agrarian Exit and Migrant Labor Transitions in Tamil Nadu
Source: Research Square preprint supplement (doi:10.21203/rs.3.rs-6572387/v1), 2025-06-03
Supplement: Supplementary file 1 [file d60cc109fc6da76d54507b04.docx]

**Appendix A: Summary of DID Model Design and Data Sources**

| **Component** | **Details** |
| --- | --- |
| **Treatment Group (Districts)** | Districts with >25% decline in cultivators/agricultural laborers between 2001–2011.  Examples: Coimbatore, Thanjavur |
| **Control Group (Districts)** | Districts with <10% decline in cultivators/agricultural laborers.  Examples: Dharmapuri, Tiruvallur |
| **Threshold Justification** | Thresholds reflect severe vs. stable agrarian labor shifts, ensuring distinct "treatment intensity" across districts. |
| **Outcome Variable (Yit)** | Agricultural productivity, farm household income, rural wage levels, labor availability |
| **Treatment Indicator (Treatmenti)** | Binary variable = 1 for treatment districts; 0 for control districts |
| **Time Indicator (Postt)** | Binary variable = 1 for post-2011 observations (post-migration shock); 0 for pre-2011 |
| **Interaction Term (Treatmenti×Postt)** | Captures the causal impact of migration on outcome variables |
| **Covariates (Xit)** | District-level controls: education level, irrigation access, rainfall deviation, industrial employment share |
| **Error Term (ϵit)** | Captures unobserved time-varying district effects |
| **Key Data Sources** | • Census of India (2001, 2011)  • PLFS Reports (2017–2021)  • NABARD NAFIS (2016–17)  • Tamil Nadu Agricultural Reports (2005–2020) |
| **Data Years Covered** | 2001–2021 (cross-sectional and longitudinal where possible) |
| **Planned Extensions** | Incorporate spatial econometric models (e.g., GWR, spatial lag) to account for diffusion of migration effects across neighboring districts |
| **Gender Disaggregation** | Where available, outcomes were analyzed separately for female-headed farm households to assess gendered impacts of migration |
